# Supplementary material for: CAR- and TRuC-redirected regulatory T cells differ in capacity to control adaptive immunity to FVIII
Source: PubMed Central journal article supplement — Mol Ther. 2021 May 1;29(9):2660–76. doi: 10.1016/j.ymthe.2021.04.034 (PMC8417451; doi:10.1016/j.ymthe.2021.04.034), 2021-05-01
Supplement: mmc1.pdf [file mmc1.pdf]

YMTHE, Volume 29

## **Supplemental Information**

**CAR- and TRuC-redirected regulatory**

**T cells differ in capacity to control**

**adaptive immunity to FVIII**

**Jyoti Rana, Daniel J. Perry, Sandeep R.P. Kumar, Maite Muñoz-Melero, Rania Saboungi, Todd M. Brusko, and Moanaro Biswas**

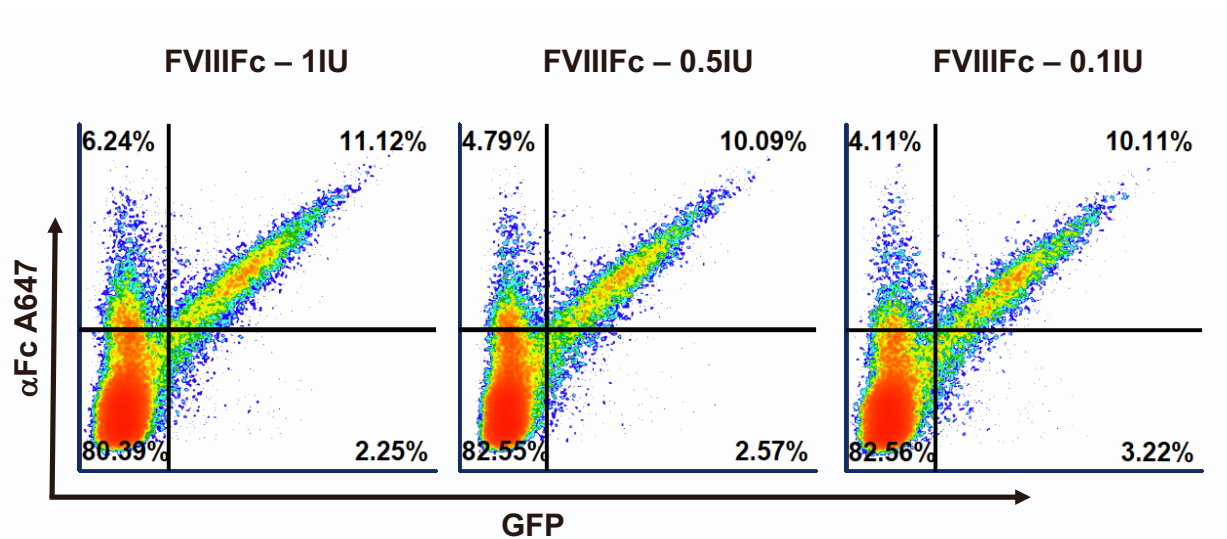

**Supplementary Figure 1. FVIII CAR binds antigen with high sensitivity.** Transduced (GFP<sup>+</sup>) WT CAR Treg cells were incubated with 1, 0.5 or 0.1 IU of FVIII Fc for 20 minutes at RT, following which percentage of GFP<sup>+</sup> cells that bound FVIII Fc was detected by αFc conjugated to AF647 by flow cytometry.

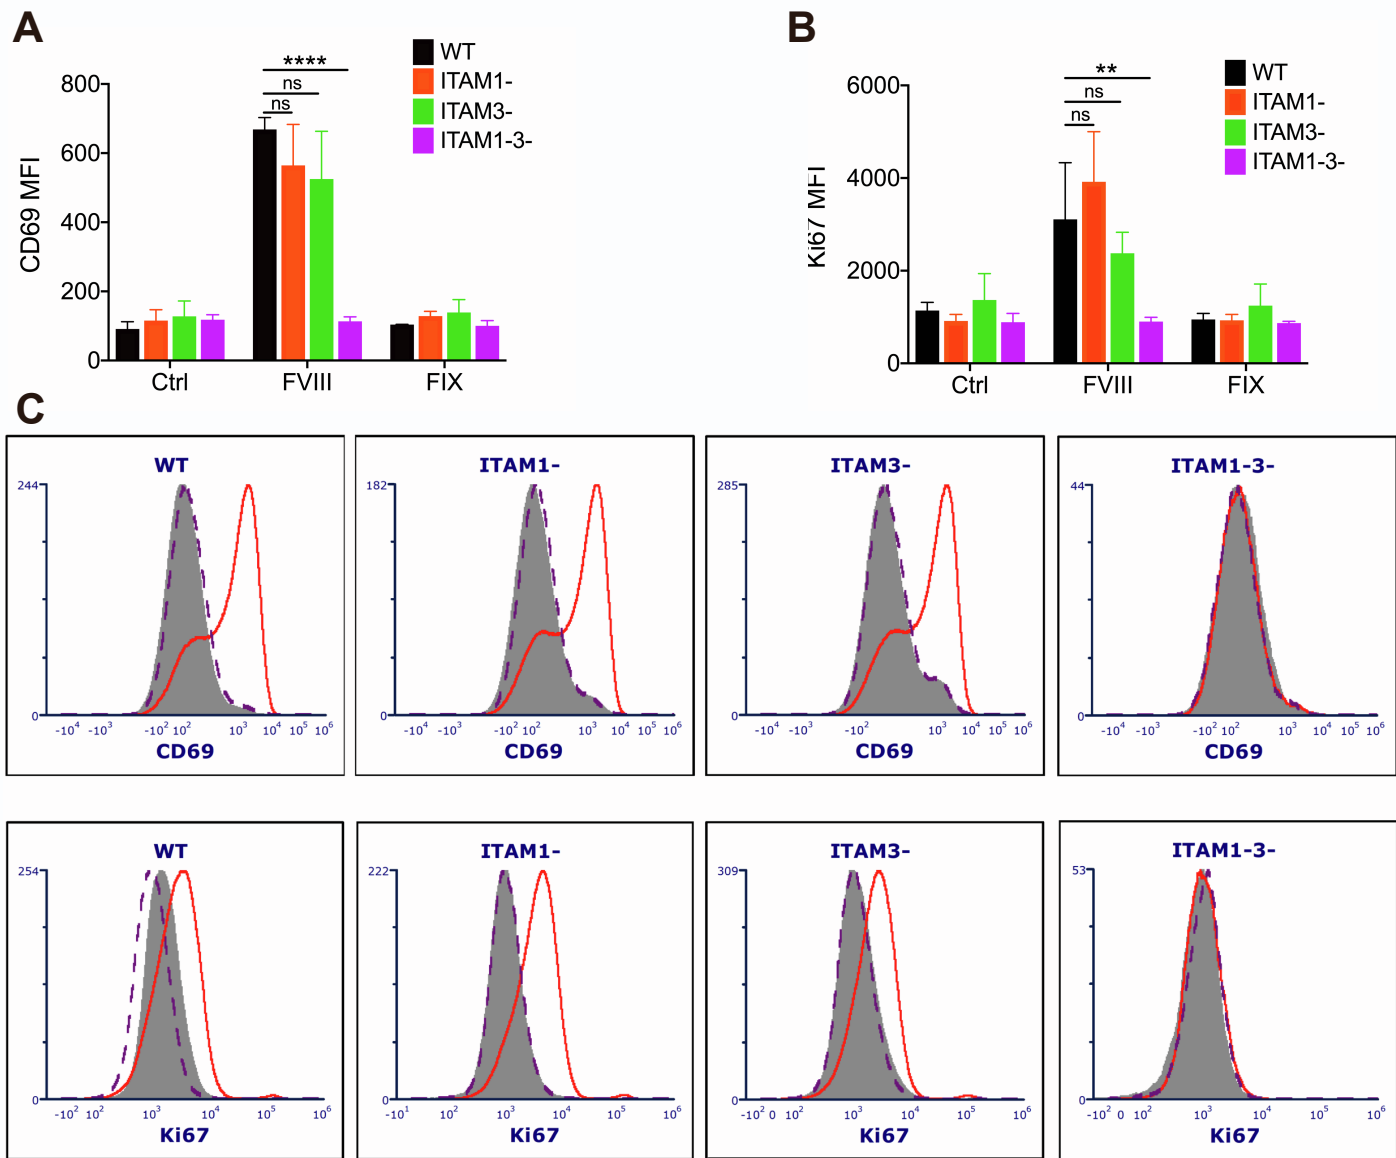

**Supplementary Figure 2. ITAM1 or ITAM3 mutations do not affect CAR Treg activation.** BDD-FVIII stimulation of WT, ITAM1<sup>-</sup> or ITAM3<sup>-</sup> FVIII CAR transduced Treg cells for 48h does not affect upregulation of **A**) CD69 or **B**) Ki67 *in vitro*, whereas double ITAM1-3<sup>-</sup> mutation deactivates CD69 and Ki67 expression. Bar graphs of Tregs transduced with WT, ITAM1<sup>-</sup>, ITAM3<sup>-</sup> or ITAM1-3<sup>-</sup> mutated FVIII CARs. **C**) Representative histogram plots showing MFI for CD69 and Ki67 in WT, ITAM1<sup>-</sup>, ITAM3<sup>-</sup> or ITAM1-3<sup>-</sup> mutated FVIII CAR Tregs. Data points are averages  $\pm$  SEM. \* P<0.05, \*\* P<0.01, \*\*\* P<0.001, \*\*\*\* p<0.0001 by 2-way ANOVA with Dunnett's multiple comparisons test.

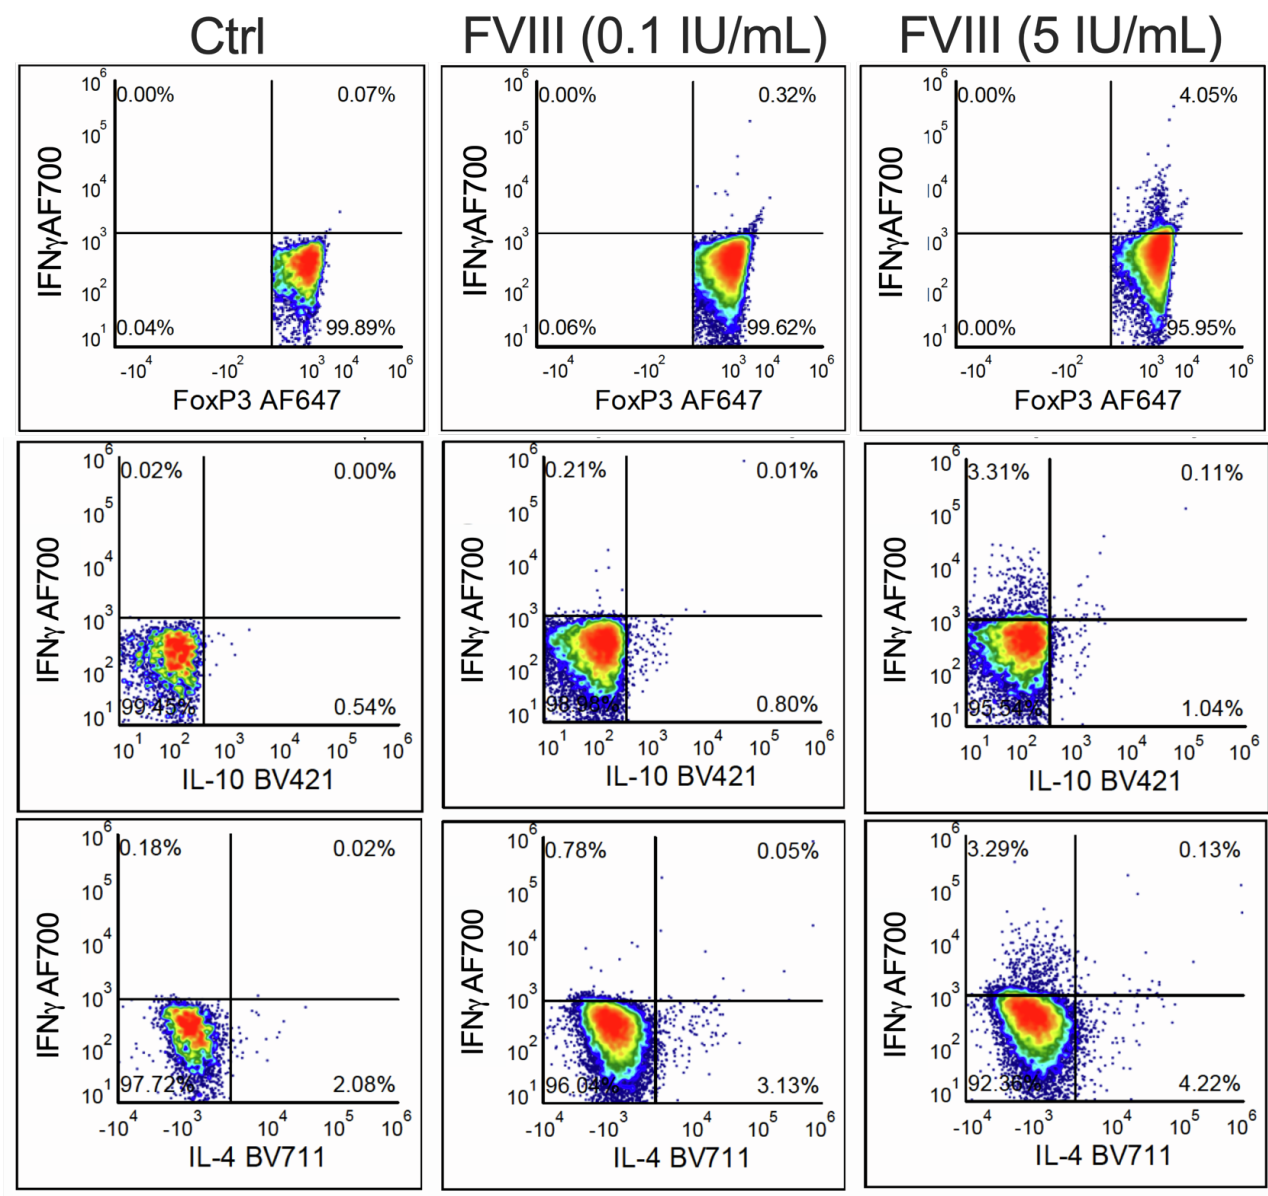

**Supplementary Figure 3. CAR Tregs exhibit heterogenous cytokine release.** Representative intracellular cytokine staining plots of BDD-FVIII stimulated CAR Tregs *in vitro*, depicting co-expression of FoxP3 and IFN<sub>γ</sub>, as well as a heterogenous population of IL-4, IL-10 and IFN<sub>γ</sub> secreting cells.

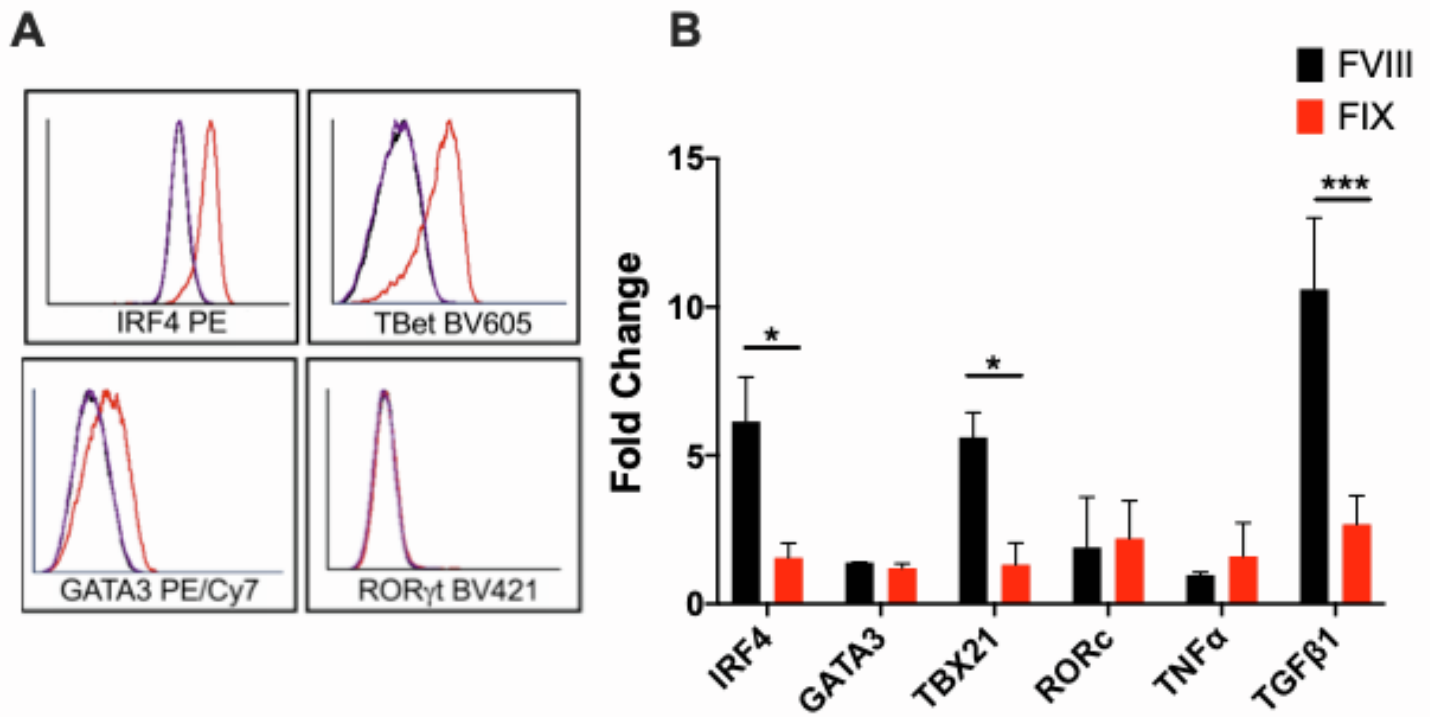

**Supplementary Figure 4. Heterogeneous transcription factor expression by FVIII CAR Tregs. A)** Representative histogram plots showing upregulation of transcription factors IRF4, TBet, GATA3, but not ROR $\gamma$ t by BDD-FVIII stimulated CAR Tregs (red histograms) as compared to unstimulated controls (purple histogram). **B)** mRNA expression levels for IRF4, GATA3, TBX21, RORc, TNF $\alpha$  and TGF $\beta$ 1 in BDD-FVIII or FIX stimulated FVIII CAR Tregs as determined by real time RT-PCR. Fold upregulation in mRNA expression is normalized to the housekeeping gene GAPDH and to unstimulated control. Data points are averages  $\pm$  SEM. \* P<0.05, \*\* P<0.01, \*\*\* P<0.001 by 2-way ANOVA with Sidak's multiple comparisons test.

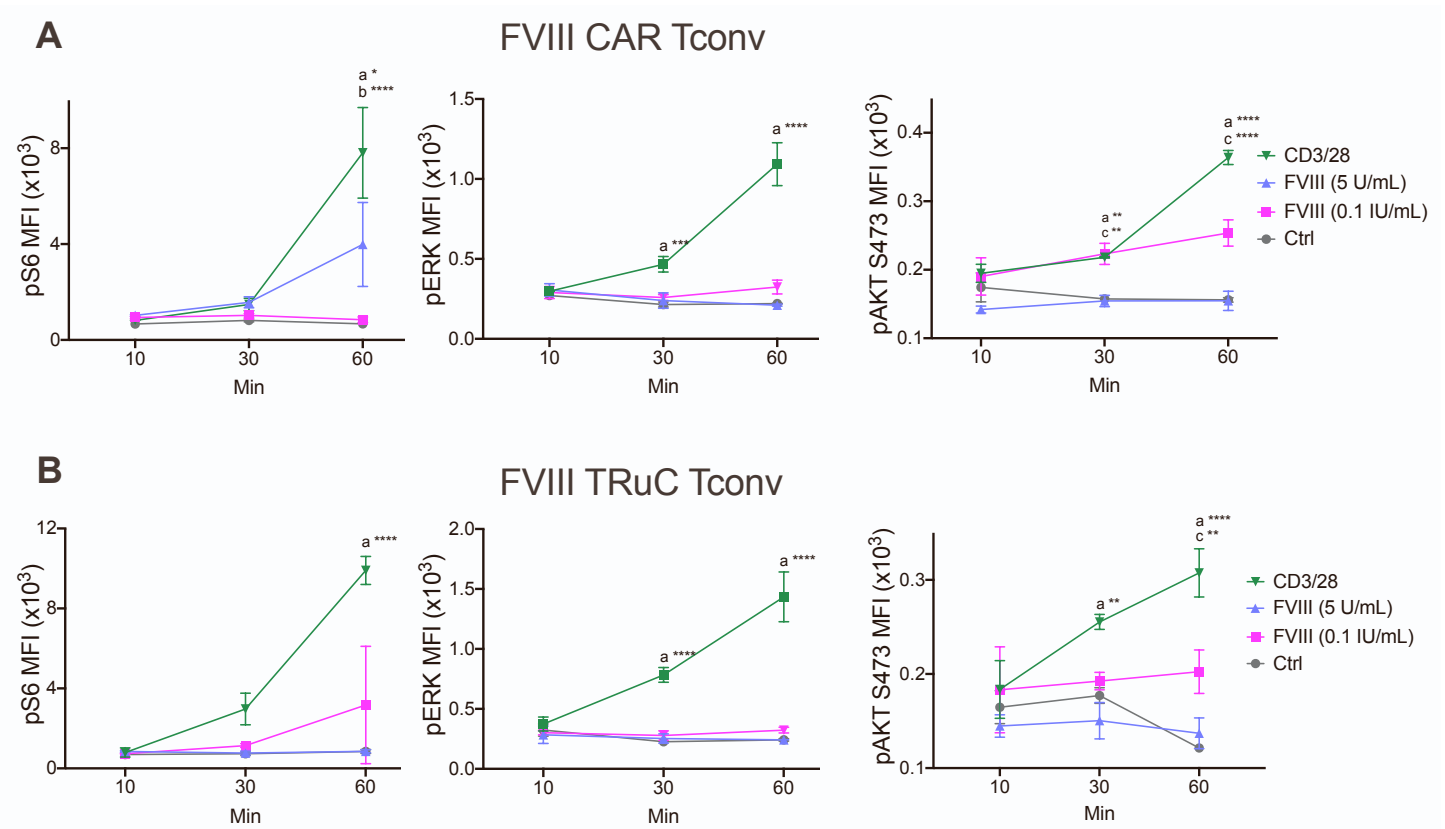

**Supplementary Figure 5. TCR triggering of CAR or TRuC engineered Tconv cells elicits a strong signaling response.** Phospho-flow cytometry of FVIII CAR Tconv and FVIII TRuC Tconv cells for estimation of pS6, pERK, pAKT (S473) at indicated times following stimulation with anti-CD3/28 microbeads, high dose (5 IU/mL) BDD-FVIII, low dose (0.1 IU/mL) BDD-FVIII, or unstimulated controls. Data points are averages  $\pm$  SEM. \*  $P < 0.05$ , \*\*  $P < 0.01$ , \*\*\*  $P < 0.001$ , \*\*\*\*  $p < 0.0001$  by 2-way ANOVA with Tukey's multiple comparison test. Groups with significant differences are annotated **a**: anti-CD3/28 vs control, **b**: FVIII (5 IU/mL) vs control, **c**: FVIII (0.1 IU/mL) vs control.

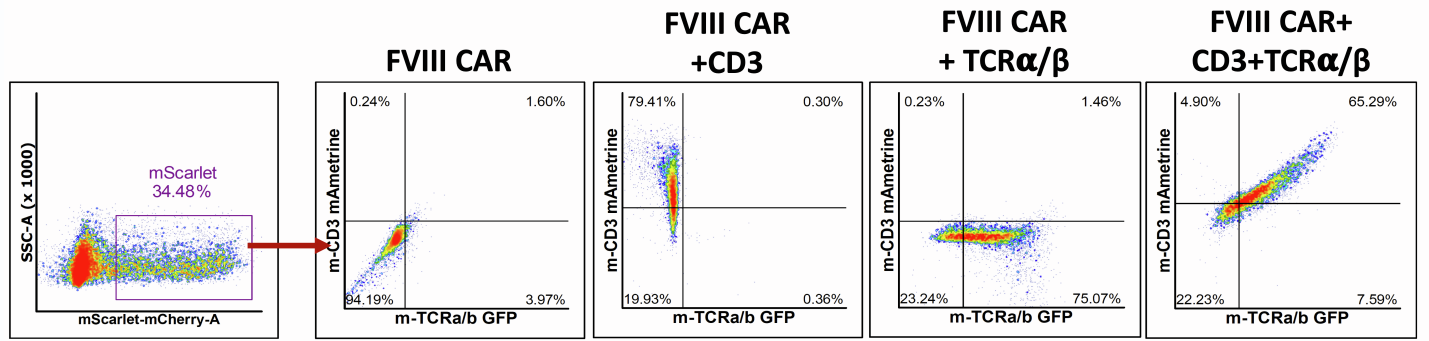

← **FVIII Binding** →

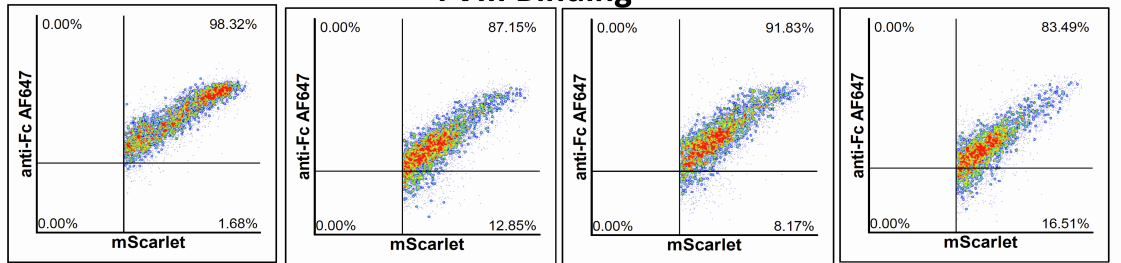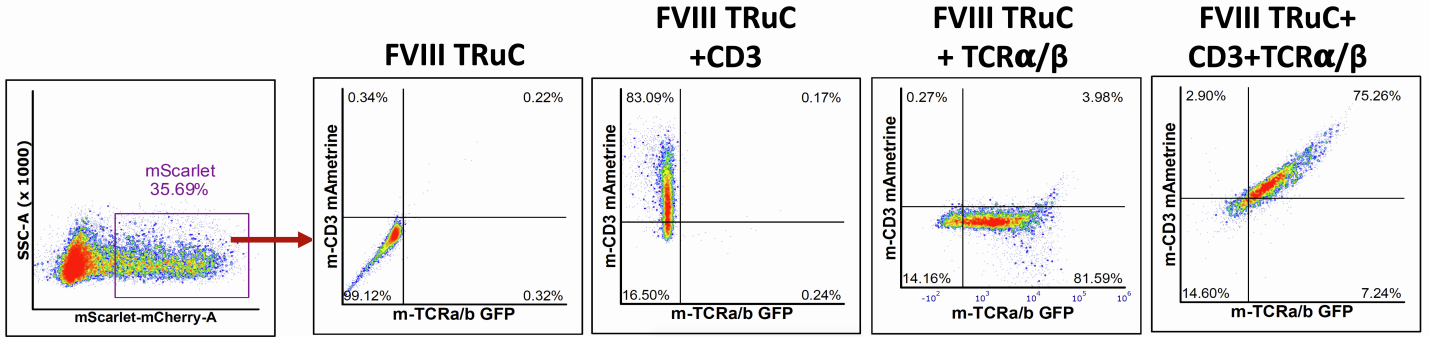

← **FVIII Binding** →

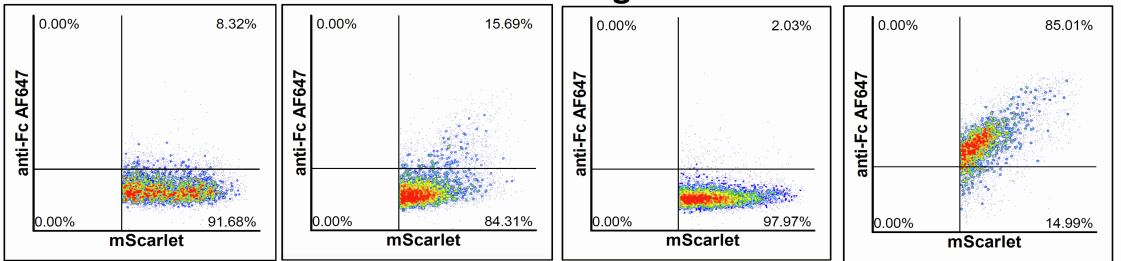

**Supplementary Figure 6. Surface expression of FVIII TRuC is dependent on incorporation into the TCR-CD3 complex.** FVIII CAR and FVIII TRuC plasmids were either singly transfected into HEK-293 cells, or co-transfected with the murine CD3 $\delta\gamma\epsilon\zeta$  (CD3) plasmid with mAmetrine tag, murine TCR alpha/beta encoding plasmid (TCR $\alpha/\beta$ ) with GFP tag, or both plasmids, CD3+TCR $\alpha/\beta$  to form the TCR-CD3 complex, (GFP<sup>+</sup>mAmetrine<sup>+</sup>). FVIII CAR or FVIII TRuC (mScarlet<sup>+</sup>) surface expression was confirmed by incubation with 1IU FVIII Fc, for 20 minutes at RT, following which the percentage of mScarlet<sup>+</sup> cells that bound FVIII Fc was detected by  $\alpha$ Fc conjugated to AF647 by flow cytometry. FVIII CAR surface expression was independent of expression of CD3, TCR, or the TCR-CD3 complex. However, FVIII TRuC surface expression was dependent on co-expression of CD3 and TCR $\alpha/\beta$ , indicating its incorporation into the CD3-TCR complex.



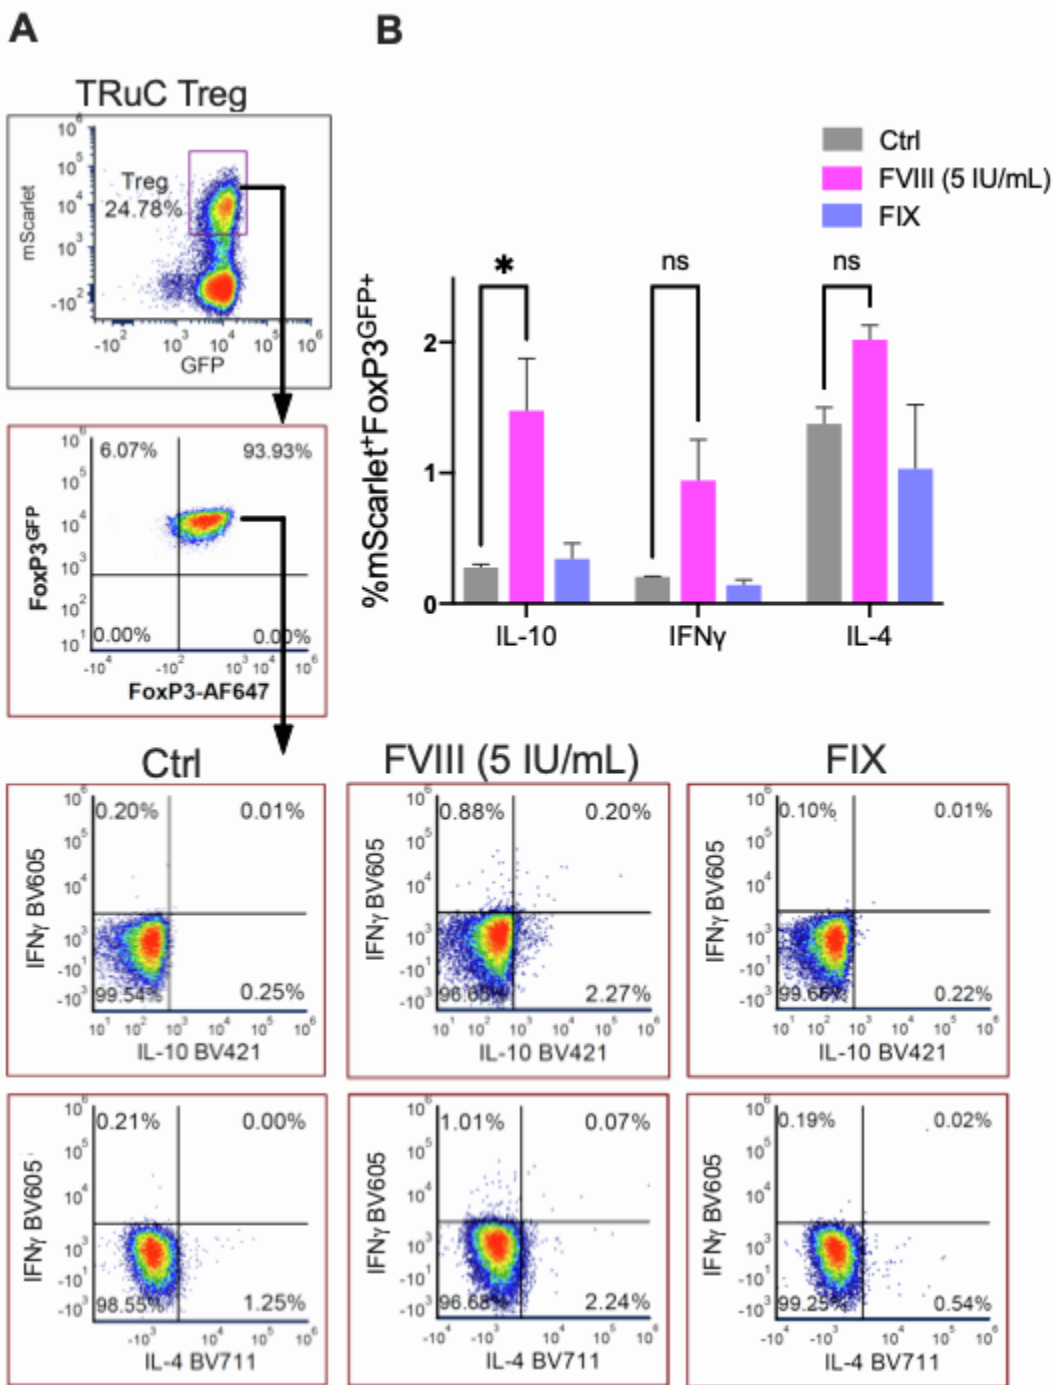

**Supplementary Figure 7. FVIII TRuC Tregs exhibit controlled cytokine expression. A)** Intracellular cytokine staining of FVIII TRuC transduced Tregs stimulated with BDD-FVIII (5IU/mL), an irrelevant antigen, FIX or left unstimulated (Ctrl) for 36h in vitro. Representative dot plots to assess whether IFN $\gamma$  and IL-10 or IFN $\gamma$  and IL-4 are co-expressed. **B)** Bar graphs for the same. Data points are averages  $\pm$  SEM. \*  $P < 0.05$ , \*\*  $P < 0.01$ , \*\*\*  $P < 0.001$  by 1-way ANOVA with Tukey's multiple comparisons for **(B)**.

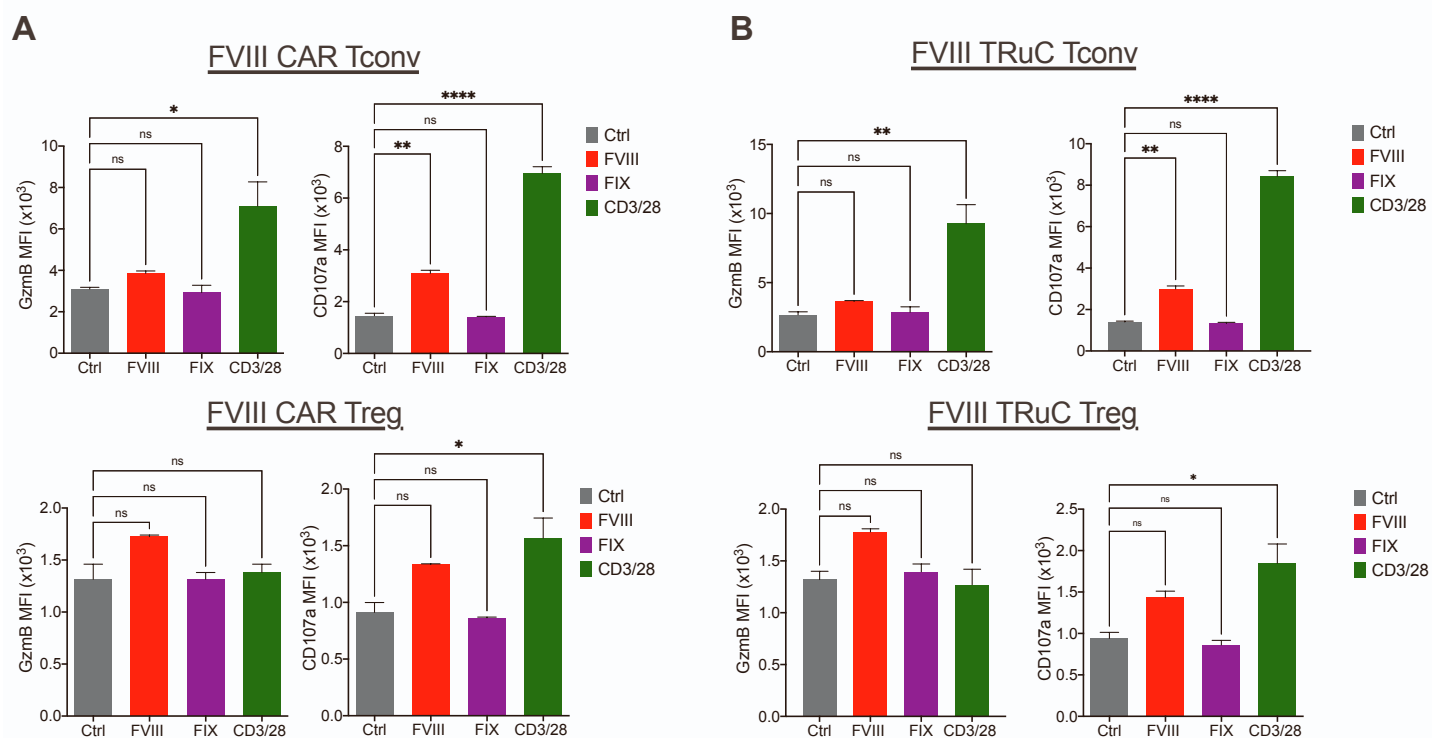

**Supplementary Figure 8. FVIII specific CAR or TRuC Tregs do not upregulate cytotoxic markers *in vitro*.** Upregulation of Granzyme B and CD107a in **(A)** FVIII stimulated CAR Tconv cells or CAR Tregs and **(B)** FVIII stimulated TRuC Tconv cells or TRuC Tregs. Mock stimulated cells, cells stimulated with an irrelevant antigen or anti-CD3/28 bead stimulated cells serve as controls. Data points are averages  $\pm$  SEM. \*  $P < 0.05$ , \*\*  $P < 0.01$ , \*\*\*  $P < 0.001$  by 1-way ANOVA with Tukey's multiple comparisons.
